# Supplementary material for: Observed improvement in air quality in Delhi during 2011–2021: Impact of mitigation measures
Source: Copernicus journal article supplement (doi:10.5194/egusphere-2024-803), 2024-04-19
Supplement: Supplementary file 1 [file egusphere-2024-803-supplement.pdf]

## Supplementary material

**Table S1: Delhi AQMS site description**

| long     | lat       | location         | station name | micro-environment                 |
|----------|-----------|------------------|--------------|-----------------------------------|
| 77.09996 | 28.556198 | Airport(T3)      | Palam        | Airport + Passenger traffic       |
| 77.19    | 28.54     | IIT Delhi        | IIT-D        | Residential + Dumpground          |
| 77.22165 | 28.589602 | Lodhi Road       | IMDL         | City Green Area +Residential      |
| 77.12677 | 28.48264  | Ayanagar         | IMDA         | Urbanizing Suburban background    |
| 77.17    | 28.64     | Pusa             | NPL          | City reserved forest/agricultural |
| 77.35991 | 28.625053 | Noida            | NCMRWF       | Industrial -Upwind Entry          |
| 77.20037 | 28.721246 | Dhirpur          | CVR          | Rapidly urbanizing green area     |
| 77.27447 | 28.550975 | Mathura Road     | CRR1         | Heavy Traffic junction            |
| 77.2115  | 28.687764 | Delhi University | DU           | Mixed-Traffic+Residential         |
| 77.14891 | 28.423547 | Gurugram         | NISEG        | Upwind and background station     |

### **High Fire Activity Period (HFAP)**

A high fire activity period (HFAP) is defined based on MODIS fire counts to study the influence of this fire episode on the air quality over study region. HFAP is defined when three days running mean of MODIS fire counts exceeds the median fire counts during the study period (Kumar et al., 2011; Bhardwaj et al., 2018; Yarragunta et al., 2020) .

Bhardwaj Piyush , Manish Naja, Maheswar Rupakheti, Aurelia Lupascu, Andrea Mues, Arnico Kumar Panday, Rajesh Kumar, Khadak Singh Mahata, Shyam Lal, Harish C. Chandola, M. G. L. (2018). Variations in surface ozone and carbon monoxide in the Kathmandu Valley and surrounding broader regions during SusKat-ABC field campaign: Role of local and regional sources. *Atmospheric Chemistry and Physics*, 18(16), 11949–11971. <https://doi.org/10.5194/acp-18-11949-2018>

Kumar, R., Naja, M., Satheesh, S. K., Ojha, N., Joshi, H., Sarangi, T., Pant, P., Dumka, U. C., Hegde, P., & Venkataramani, S. (2011). Influences of the springtime northern Indian biomass burning over the central Himalayas. *Journal of Geophysical Research: Atmospheres*, 116(D19), 302. <https://doi.org/10.1029/2010JD015509>

Yarragunta, Y., Srivastava, S., Mitra, D., & Chandola, H. C. H. C. (2020). Influence of forest fire episodes on the distribution of gaseous air pollutants over Uttarakhand, India. *GIScience and Remote Sensing*, 57(2), 190–206. <https://doi.org/10.1080/15481603.2020.1712100>
