# Supplementary material for: Observed improvement in air quality in Delhi during 2011–2021: Impact of mitigation measures
Source: Copernicus journal article supplement (doi:10.5194/egusphere-2024-803), 2024-04-19
Supplement: Supplementary file [file egusphere-2024-803-AC2-supplement.pdf]

## REPLY to RC2

Reply to each comment is marked in 'purple' colour

- **RC2:** ['Comment on egusphere-2024-803'](#), Anonymous Referee #1, 15 May 2024 [reply](#)

The manuscript evaluates the efficiency of air quality control policies in India. Notable reduction in particulate pollution was seen and the authors were able to estimate trends for the annual pollution levels. The topic of the manuscript is of interest for readers of ACP and overall, the presentation of the results is clear. However, some concerns need to be addressed before I can recommend the MS for publication.

Thank you for your positive feedback on our manuscript and for highlighting its relevance to the readers of ACP. We appreciate your recognition of the clarity in our presentation and the significance of our findings on the efficiency of air quality control policies in India, particularly in the capital city, Delhi. We acknowledge your concerns and are committed to addressing them thoroughly to enhance the quality and consistency of our study. We are currently reviewing your specific comments and will make the necessary revisions to ensure our manuscript meets the high standards of ACP.

My main concern is that the method for trend estimation is not statistically sound, and it is not capable of answering the questions researchers are trying to solve. The 13-month moving average is claimed to de-seasonalize the data, but it only smooths the variation. The trend probably is not linear and t-test is definitely not a method for calculating a trend. With appropriate trend fitting methods, deseasonalization is not even needed but the seasonal variation can be taken account in the trend calculation.

Thank you for your concern regarding the trend calculation. We have followed the methodology used by various researchers, as referenced in Section 2.4 of the manuscript.

Page 6, Section 2.4, Lines 24-31: 'For the trend calculation over Delhi for 2011-2021, we used monthly averaged concentrations of PM<sub>2.5</sub> and PM<sub>10</sub>. The datasets were first de-seasonalized by applying a 13-month moving average to obtain an initial trend estimate, followed by a stable seasonal filter to remove the seasonal cycle. Linear regression was then applied to the de-seasonalized time series of PM<sub>2.5</sub> and PM<sub>10</sub> to calculate the linear trend. The statistical significance of the linear trend was evaluated using a parametric student t-test, and only statistically significant non-zero slopes (p-value < 0.05) were presented.'

### **Specific comments:**

Page 7, lines 24-25: averaging does not eradicate inhomogeneity. By averaging, the researchers just assume data "homogenic enough" to get representative city-level value. How justifiable this assumption is proposes another question. I would suggest a sensitivity analysis (perhaps shown in the supplement) where basic statistics would be shown and appropriate trends would be fitted to individual datasets.

The sources are heterogeneous across Delhi city; hence AQMS are located representing different microenvironments (like commercial, residential, industrial, etc) so that overall air quality of Delhi can be estimated by taking average of all stations following WMO guidelines. We will estimate each station data statistics to understand characteristic features as suggested separately.

Page 9, line 28: Announcing  $p=0.085$  as insignificant is a bit of overkill. Interpretation for p-value should not be based on some artificial threshold value but it should be treated as quantitative measure of significance. See e.g. <https://doi.org/10.1080/00031305.2016.1154108> and <https://www.nature.com/articles/d41586-019-00857-9>

Thank you for your comment. We appreciate your suggestion regarding the interpretation of p-values. We agree that p-values should be treated as a quantitative measure of significance rather than being subjected to an artificial threshold. As suggested, we will revise the manuscript to reflect this perspective. Specifically, we will interpret the p-value of 0.085 as indicating a moderate significance level and discuss its implications within the context of our study. Additionally, we will reference the guidelines provided in the cited articles to support our revised interpretation.

Section 3.4. The argument on the effect of meteorology on PM needs confirmation. The comparison of model results in different time points does not quantify the effect. This could be done with the data by using multivariable statistical models like applied here <https://doi.org/10.5194/acp-20-12247-2020> or advanced time series methodology introduced here <http://urn.fi/URN:NBN:fi:jyu-201603111829> and here [http://dx.doi.org/10.1007/978-3-030-21718-1\\_4](http://dx.doi.org/10.1007/978-3-030-21718-1_4). The same methods can also be applied in Section 3.5. in quantification of the dust storms and in 3.6. to account for stubble burning.

Thank you for your valuable comment. We appreciate the suggestion to strengthen our argument on the effect of meteorology on PM by using more rigorous quantitative methods. We followed an approach by various researchers found in the literature (Zhang et al., 2021; Hammer et al., 2021; Du et al., 2022)

Du, H., Li, J., Wang, Z., Chen, X., Yang, W., Sun, Y., Xin, J., Pan, X., Wang, W., Ye, Q., & Dao, X. (2022). Assessment of the effect of meteorological and emission variations on winter PM<sub>2.5</sub> over the North China Plain in the three-year action plan against air pollution in 2018–2020. *Atmospheric Research*, 3, 280(August), 106395. <https://doi.org/10.1016/j.atmosres.2022.106395>

Hammer, M. S., Donkelaar, A. Van, Martin, R. V., McDuffie, E. E., Lyapustin, A., Sayer, A. M., Hsu, N. C., 25 Levy, R. C., Garay, M. J., Kalashnikova, O. V., & Kahn, R. A. (2021). Effects of COVID-19 lockdowns on fine particulate matter concentrations. *Science Advances*, 7(26), 1–11. <https://doi.org/10.1126/sciadv.abg7670>

Zhang, Y., Ma, Z., Gao, Y., & Zhang, M. (2021). Impacts of the meteorological condition versus emissions reduction on the PM<sub>2.5</sub> concentration over Beijing–Tianjin–Hebei during the COVID-19 lockdown. *Atmospheric and Oceanic Science Letters*, 14(4), 100014. <https://doi.org/10.1016/j.aosl.2020.100014>

<https://doi.org/10.5194/acp-20-12247-2020>; <http://urn.fi/URN:NBN:fi:jyu-201603111829> and [http://dx.doi.org/10.1007/978-3-030-21718-1\\_4](http://dx.doi.org/10.1007/978-3-030-21718-1_4)) are good pointers to be used in the future work, we appreciate your suggestion. However, for this study we are short of station wise meteorological variables for the study period.
